# Supplementary material for: Sulfur-Doped Graphdiyne as a High-Capacity Anode Material for Lithium-Ion Batteries
Source: MDPI journal article supplement (doi:10.3390/nano11051161), 2021-04-29
Supplement: s1 [file s1]

# Sulfur-Doped Graphdiyne as a High-Capacity Anode Material for Lithium-Ion Batteries

Fanan Kong, Yong Yue, Qingyin Li, and Shijie Ren \*

State Key Laboratory of Polymer Materials Engineering, College of Polymer Science and Engineering, Sichuan University, Chengdu 610065, China

\* Correspondence: rensj@scu.edu.cn

## Contents

Section 1. NMR spectrum of the monomers

Section 2. Results of structure characterizations

Section 3. Results of porosity measurements

Section 4. Results of Electrochemical performances

## Section 1. NMR spectrum of the monomers

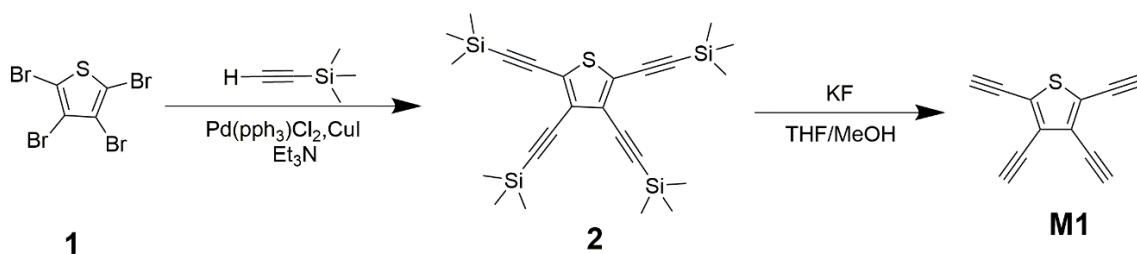

**Figure S1.** Synthesis of 2,3,4,5-tetrakis[(trimethylsilyl)ethynyl]-thiophene (**2**) and 2,3,4,5-tetraethynyl thiophene (**M1**).

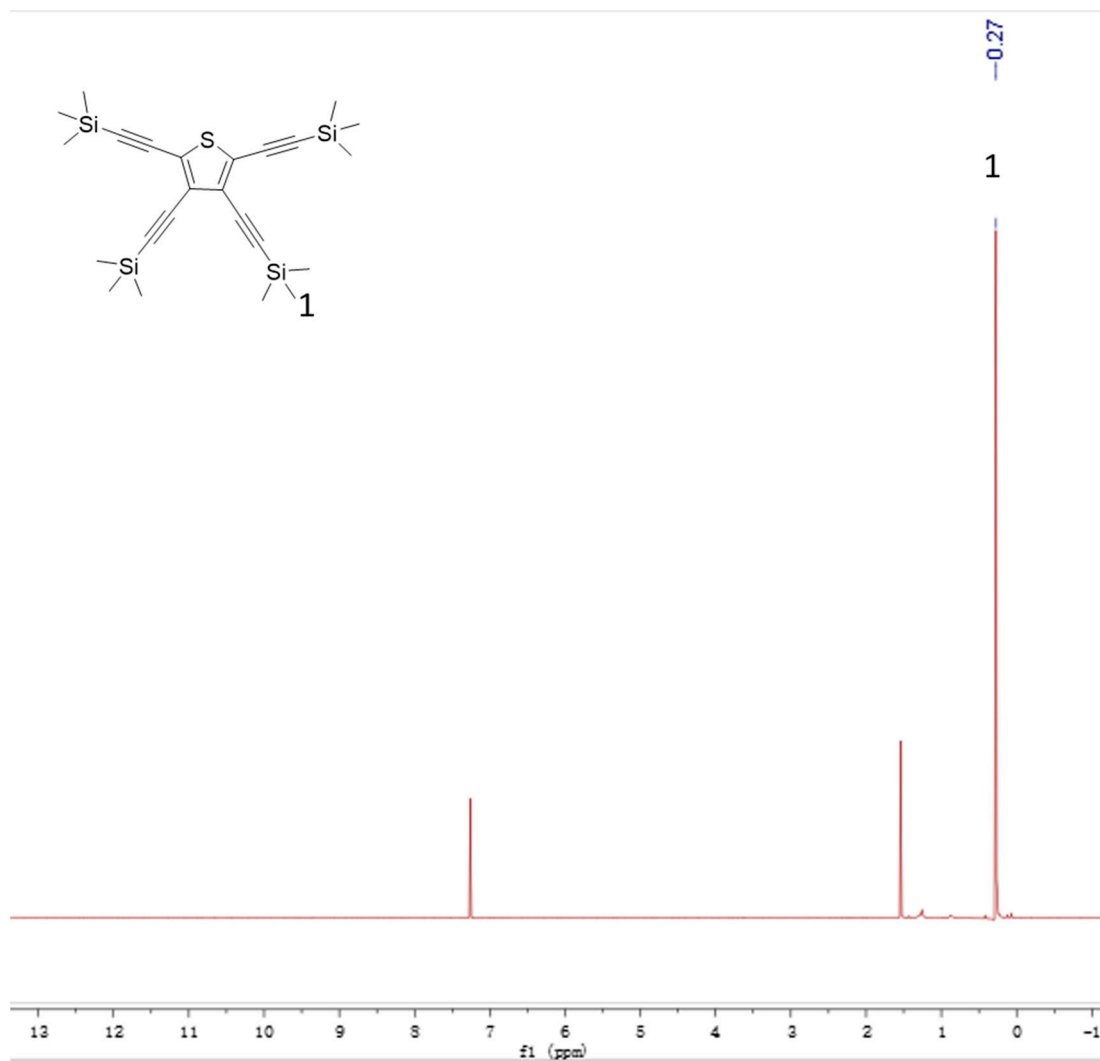

**Figure S2.**  $^1\text{H}$  NMR spectrum of 2,3,4,5-tetrakis[(trimethylsilyl)ethynyl]-thiophene (2).

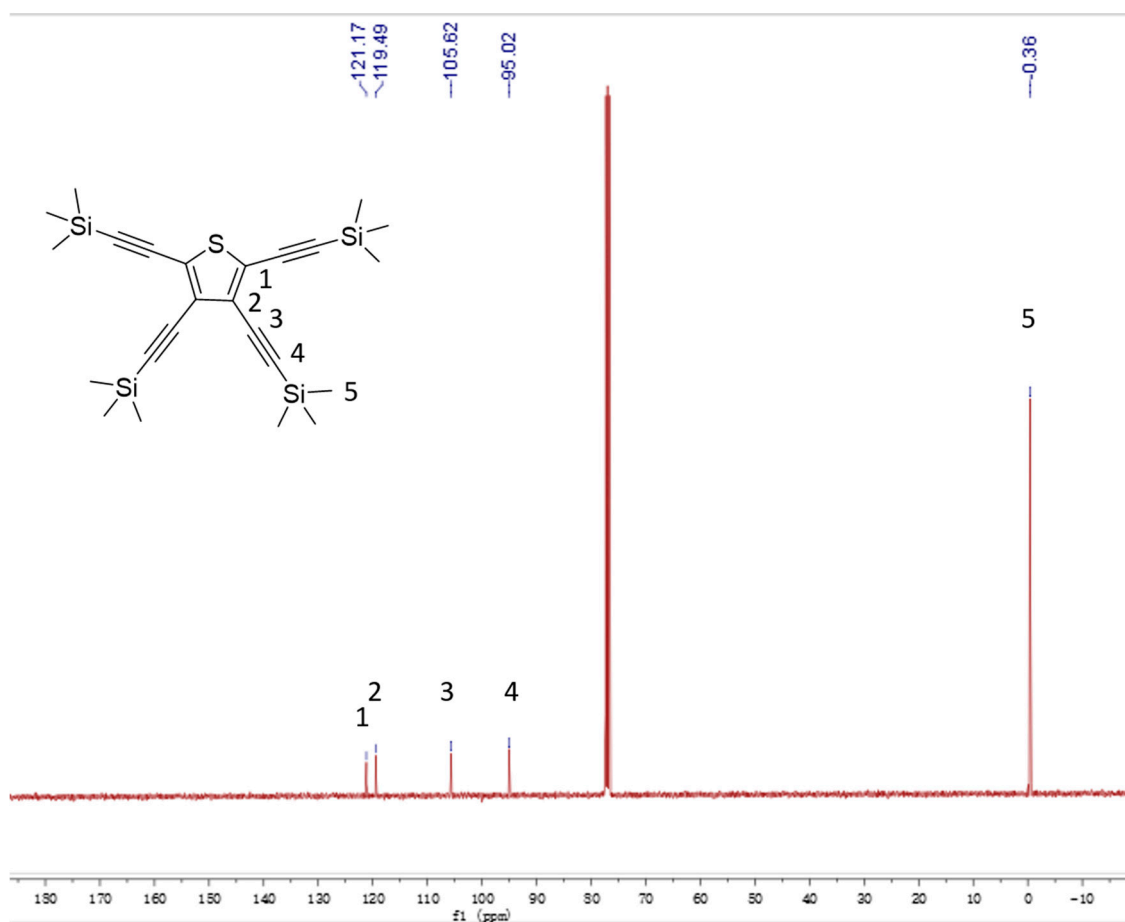

**Figure S3.**  $^{13}\text{C}$  NMR spectrum of 2,3,4,5-tetrakis[(trimethylsilyl)ethynyl]-thiophene (2).

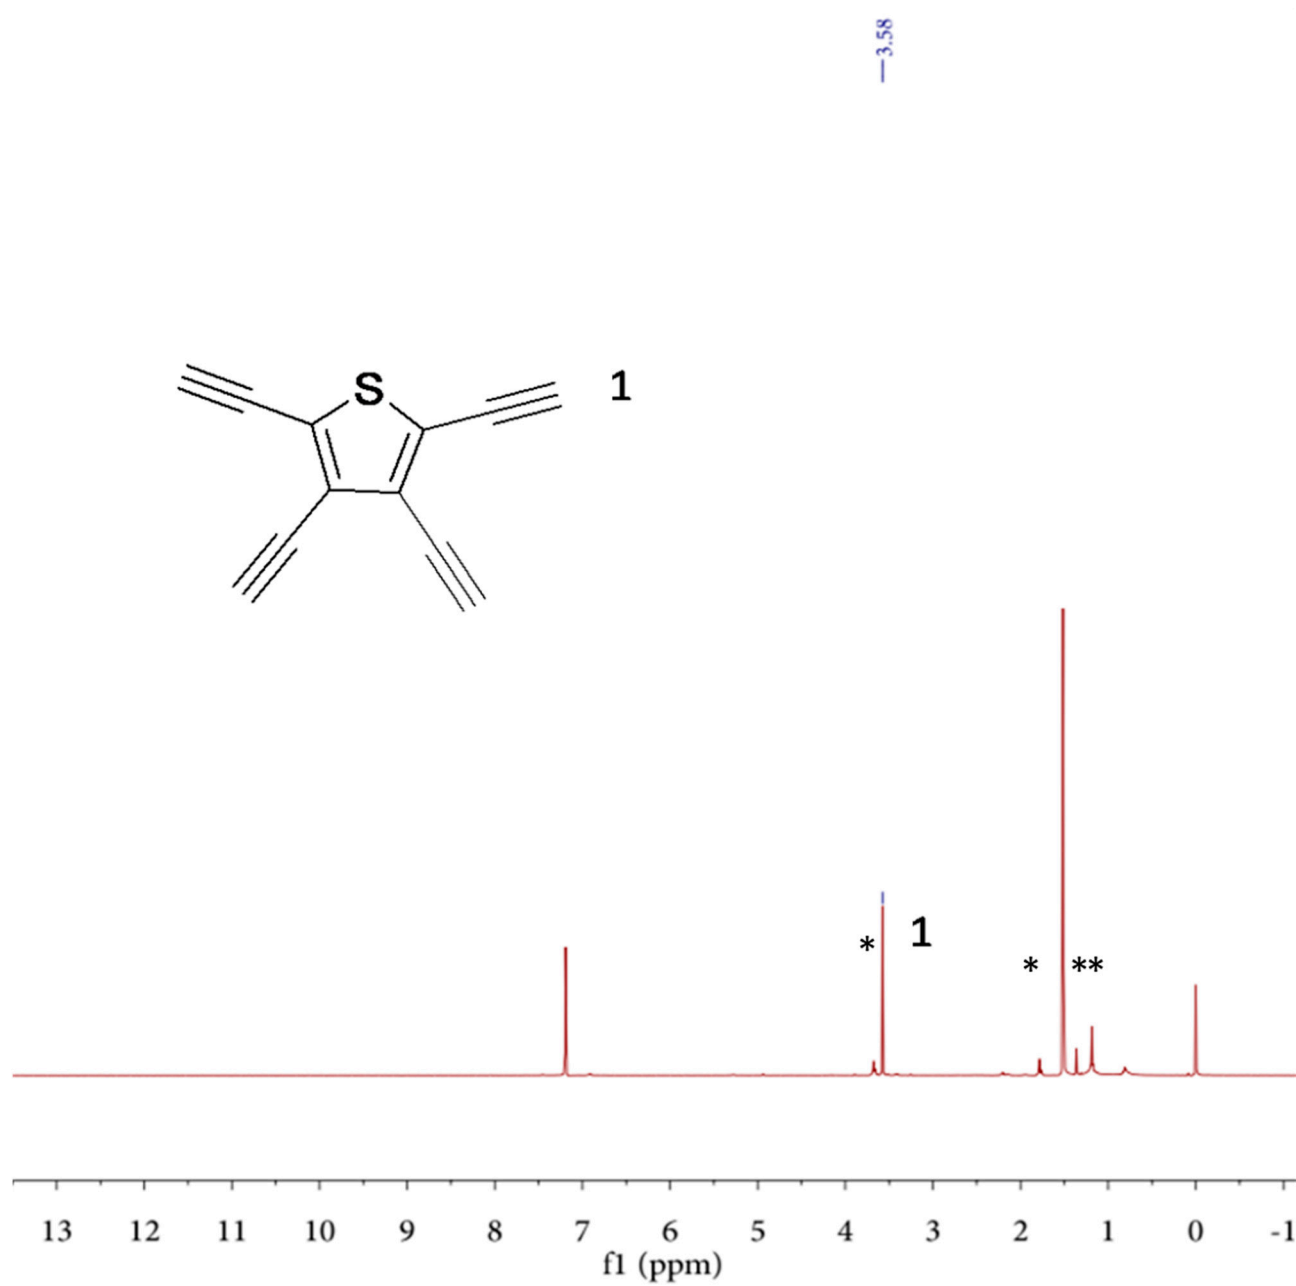

**Figure S4.** <sup>1</sup>H NMR spectrum of 2,3,4,5-tetraethynyl thiophene (**M1**). Attention: The NMR will be done immediately after the rotary evaporation since the monomer is unstable in the air. \* may be caused by some residual solvent.

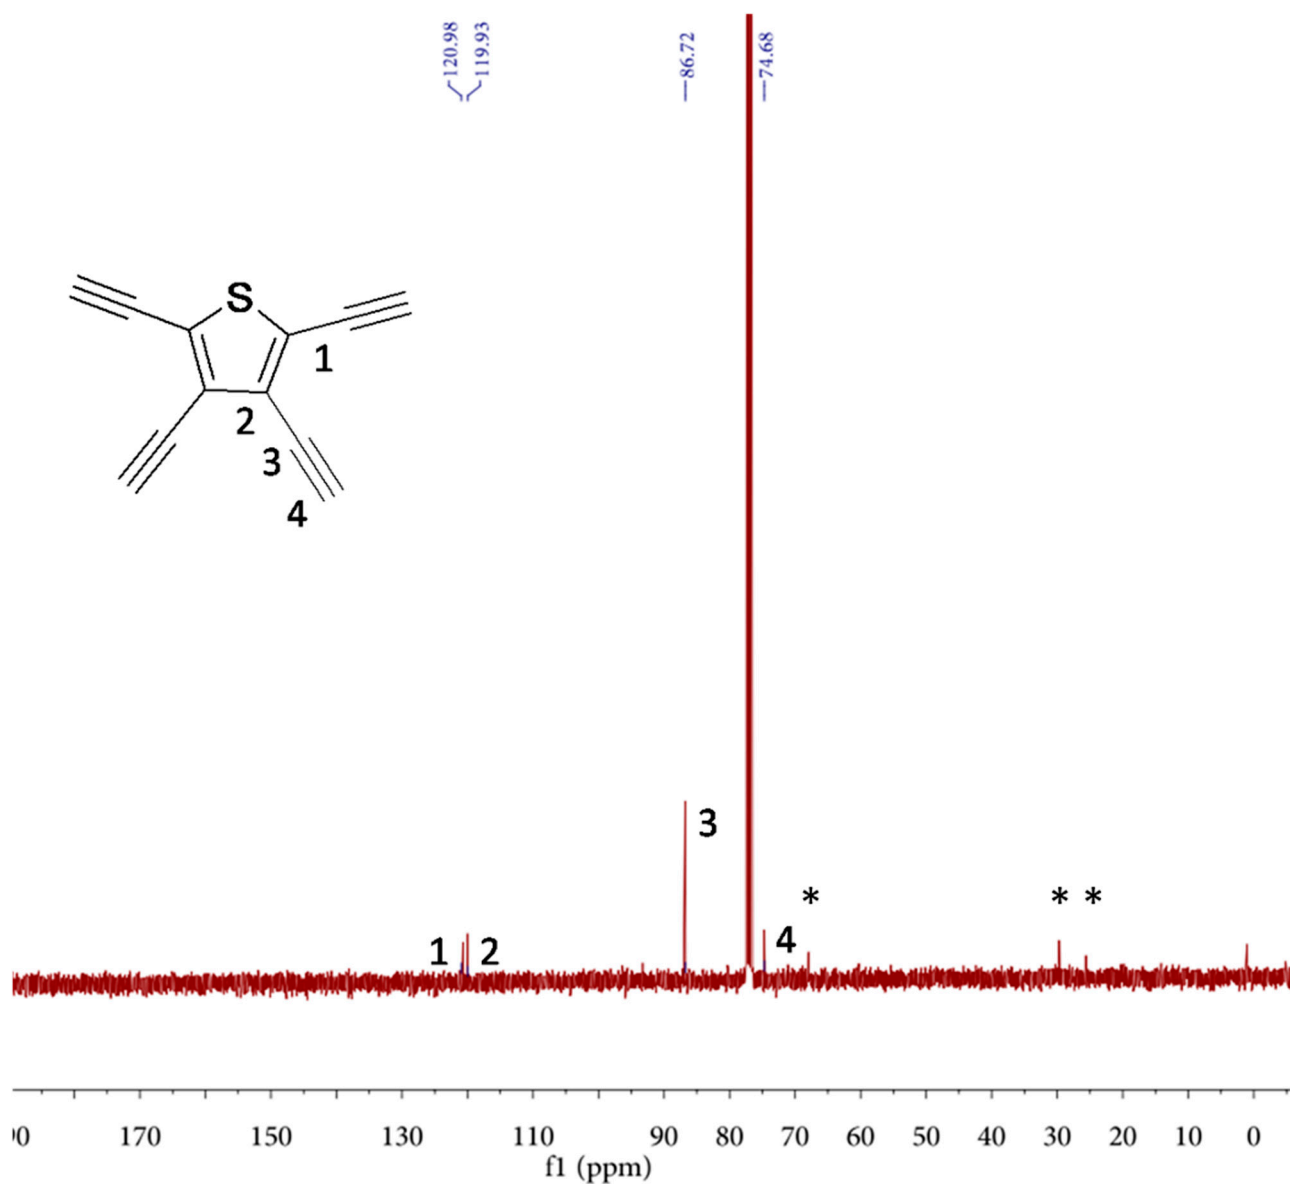

**Figure S5.**  $^{13}\text{C}$  NMR spectrum of 2,3,4,5-tetraethynyl thiophene (**M1**). Attention: The NMR will be done immediately after the rotary evaporation since the monomer is unstable in the air. \* may be caused by some residual solvent.

## Section 2. Results of structure characterizations.

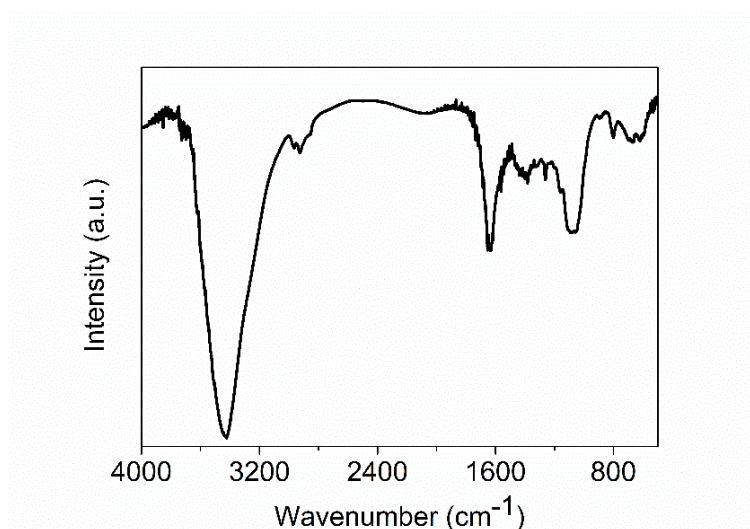

Figure S6. FT-IR spectrum of S-GDY.

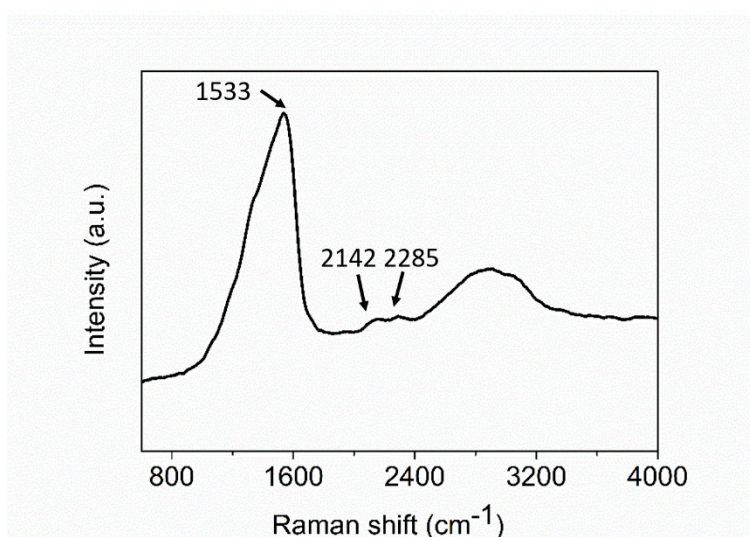

Figure S7. Raman spectrum of S-GDY.

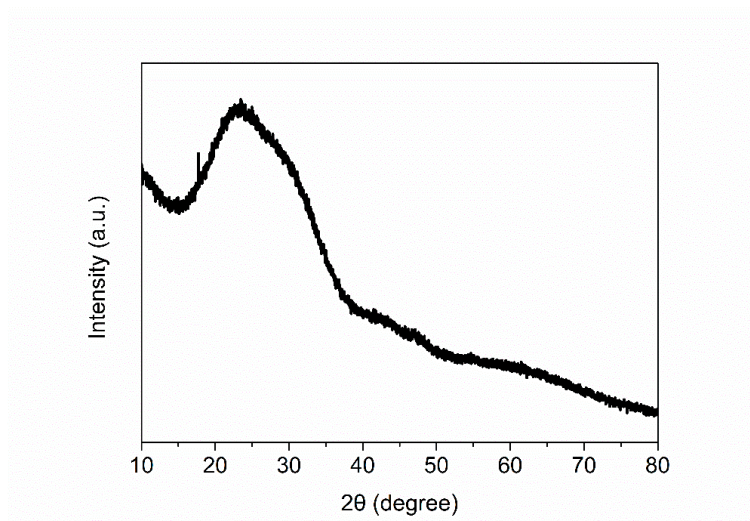

**Figure S8.** Power XRD pattern of S-GDY.

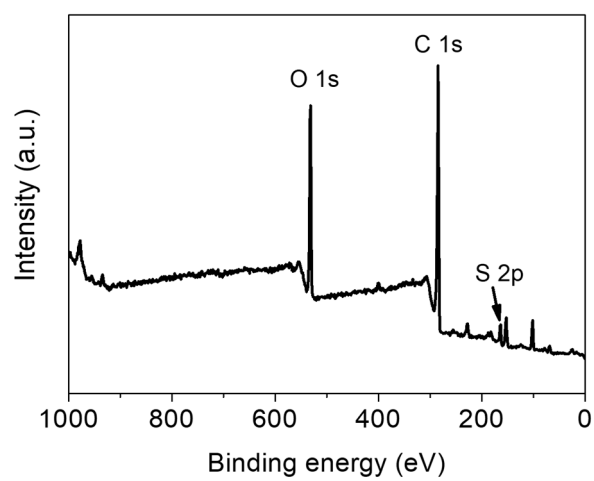

**Figure S9.** XPS survey spectrum of S-GDY.

### Section 3. Results of porosity measurements.

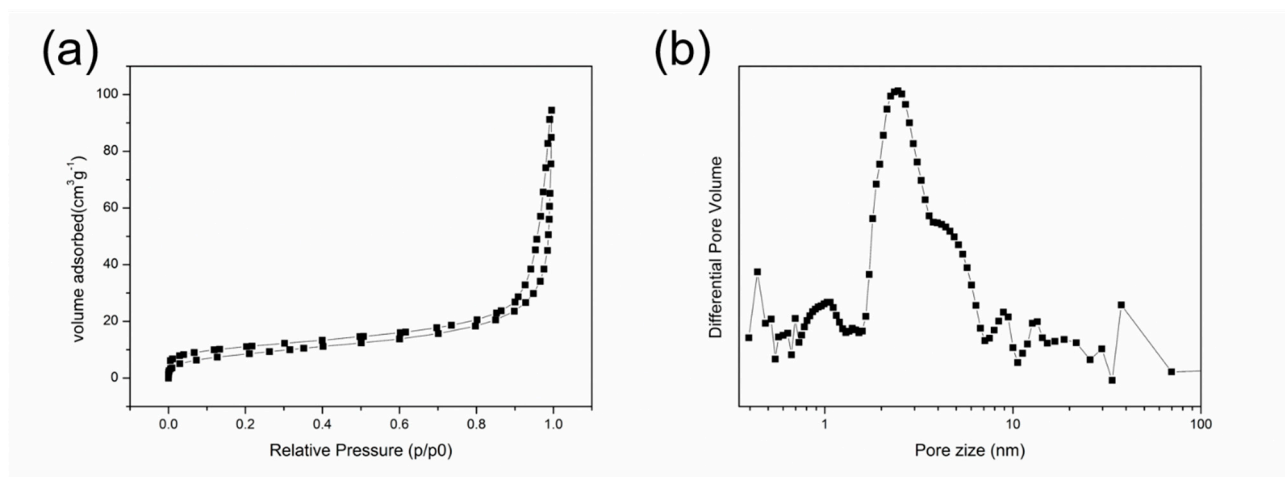

**Figure S10.** (a) Nitrogen adsorption-desorption isotherms of S-GDY, (b) pore size distribution profile from NLDFT calculation.

### Section 4. Results of Electrochemical performances

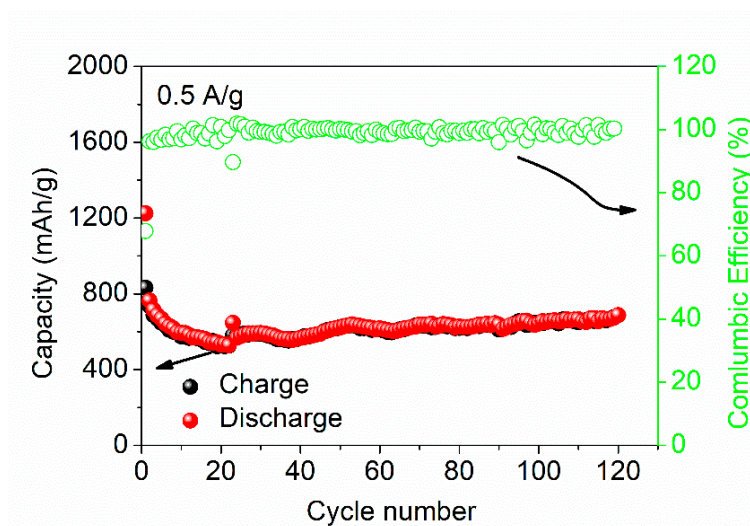

**Figure S11.** Long-term capacity retention at a current density of 0.5 A g<sup>-1</sup>.



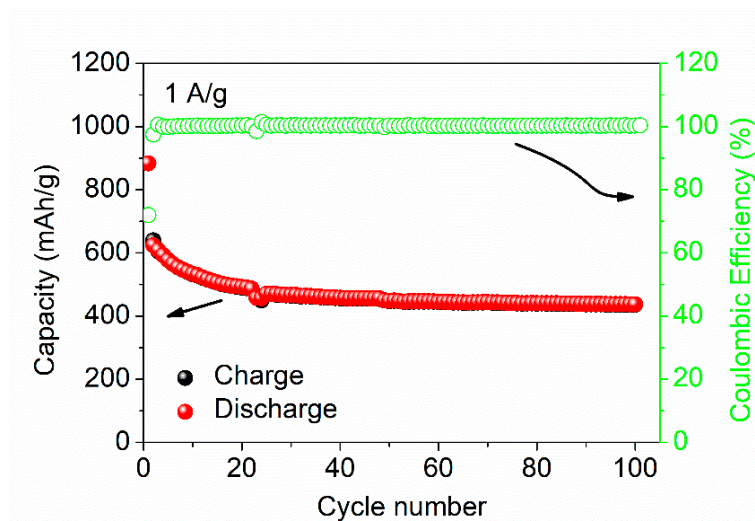

**Figure S12.** Long-term capacity retention at a current density of  $1 \text{ A g}^{-1}$ .

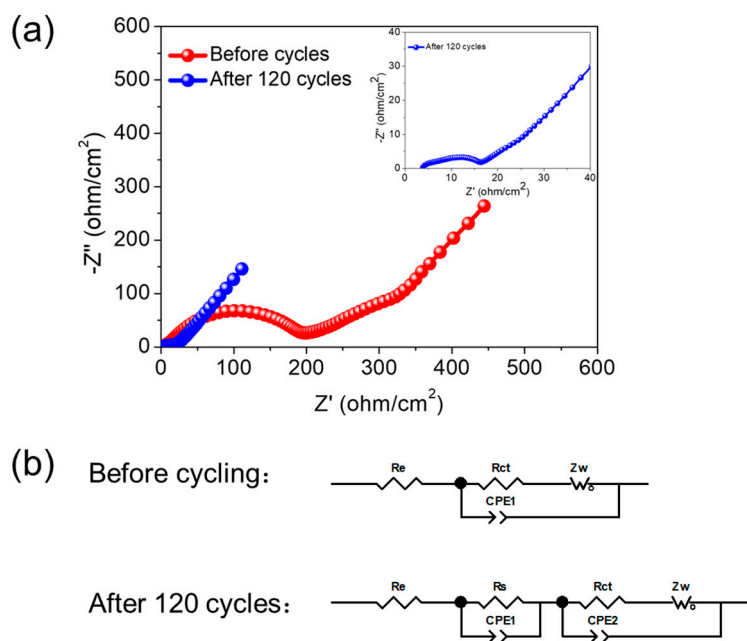

**Figure S13.** (a) Nyquist plots of the S-GDY electrode before and after 120 cycles at  $0.5 \text{ A g}^{-1}$ . The inset shows a S-GDY electrode after cycling alone in the enlarged part of the high-frequency region. (b) Equivalent circuits of the S-GDY electrode. In the equivalent circuit,  $R_e$  represents the electrolyte resistance;  $R_s$  is the equivalent resistance of the SEI layer formed on the electrode;  $R_{ct}$  is the charge-transfer resistance;  $Z_w$  is the Warburg impedance; CPE represents the corresponding double-layer capacitance.

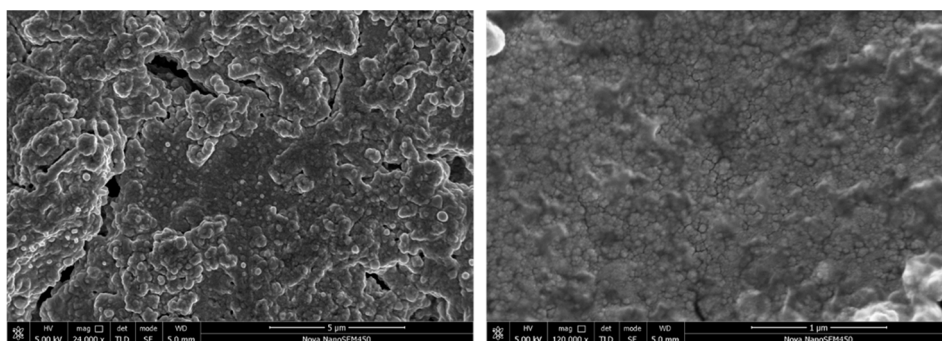

**Figure S14.** The SEM images of the S-GDY electrode after 120 cycles at 0.5 A g<sup>-1</sup>.

**Table S1.** Comparison of performance of previously reported carbon-based materials.

| Samples                             | Capacity (mA h g <sup>-1</sup> ) | Current density (mA g <sup>-1</sup> ) | Cycles |
|-------------------------------------|----------------------------------|---------------------------------------|--------|
| GDY film [1]                        | 520                              | 500                                   | 400    |
| Bulk GDY [2]                        | 552                              | 50                                    | 200    |
| N-GDY [3]                           | 785                              | 200                                   | 200    |
| Activated carbon aerogels [4]       | 610                              | 100                                   | 100    |
| N-doped porous carbon materials [5] | 488                              | 100                                   | 100    |
| Porous carbon [6]                   | 833                              | 100                                   | 50     |
| NGY [7]                             | 1037                             | 100                                   | 200    |
| S-GDY [8]                           | 810                              | 50                                    | 50     |
| TTF-GDY [9]                         | 837.6                            | 50                                    | 200    |
| This work                           | 920                              | 100                                   | 50     |

## References

- Huang, C.; Zhang, S.; Liu, H.; Li, Y.; Cui, G.; Li, Y. Graphdiyne for High Capacity and Long-Life Lithium Storage. *Nano Energy* **2015**, *11*, 481-489.
- Zhang, S.; Liu, H.; Huang, C.; Cui, G.; Li, Y. Bulk Graphdiyne Powder Applied for Highly Efficient Lithium Storage. *Chem. Commun.* **2015**, *51*, 1834-1837.
- Zhang, S.; Du, H.; He, J.; Huang, C.; Liu, H.; Cui, G.; Li, Y. Nitrogen-Doped Graphdiyne Applied for Lithium-Ion Storage. *ACS Appl. Mater. Interfaces* **2016**, *8*, 8467-8473.
- Yang, X.; Wei, C.; Zhang, G. Activated Carbon Aerogels with Developed Mesoporosity as High-Rate Anodes in Lithium-Ion Batteries. *J. Mater. Sci.* **2016**, *51*, 5565-5571.
- Zhang, X.; Zhu, G.; Wang, M.; Li, J.; Lu, T.; Pan, L. Covalent-Organic-Frameworks Derived N-Doped Porous Carbon Materials as Anode for Superior Long-Life Cycling Lithium and Sodium Ion Batteries. *Carbon* **2017**, *116*, 686-694.
- Zhang, C.; Kong, R.; Wang, X.; Xu, Y.; Wang, F.; Ren, W.; Wang, Y.; Su, F.; Jiang, J.-X. Porous Carbons Derived from Hypercrosslinked Porous Polymers for Gas Adsorption and Energy Storage. *Carbon* **2017**, *114*, 608-618.
- Yang, C.; Qiao, C.; Chen, Y.; Zhao, X.; Wu, L.; Li, Y.; Jia, Y.; Wang, S.; Cui, X. Nitrogen Doped gamma-Graphyne: A Novel Anode for High-Capacity Rechargeable Alkali-Ion Batteries. *Small* **2020**, *16*, 1907365.
- Yang, Z.; Cui, W.; Wang, K.; Song, Y.; Zhao, F.; Wang, N.; Long, Y.; Wang, H.; Huang, C. Chemical Modification of the sp<sup>2</sup>-Hybridized Carbon Atoms of Graphdiyne by Using Organic Sulfur. *Chem. - Eur. J.* **2019**, *25*, 5643-5647.
- Pan, Q.; Chen, S.; Wu, C.; Zhang, Z.; Li, Z.; Zhao, Y. Sulfur-rich Graphdiyne-Containing Electrochemical Active Tetrathiafulvalene for Highly Efficient Lithium Storage Application. *ACS Appl. Mater. Interfaces* **2019**, *11*, 46070-46076.
